# Supplementary material for: The Pathway to NDC and Carbon Neutrality: Roles of Optimum Degree between Marginal Abatement Cost and Social Cost of Carbon in Thai Power and Industrial Sector
Source: Preprints.org preprint supplement (doi:10.20944/preprints202309.2001.v1), 2023-09-28
Supplement: Supplementary file 1 [file supplementary]

**
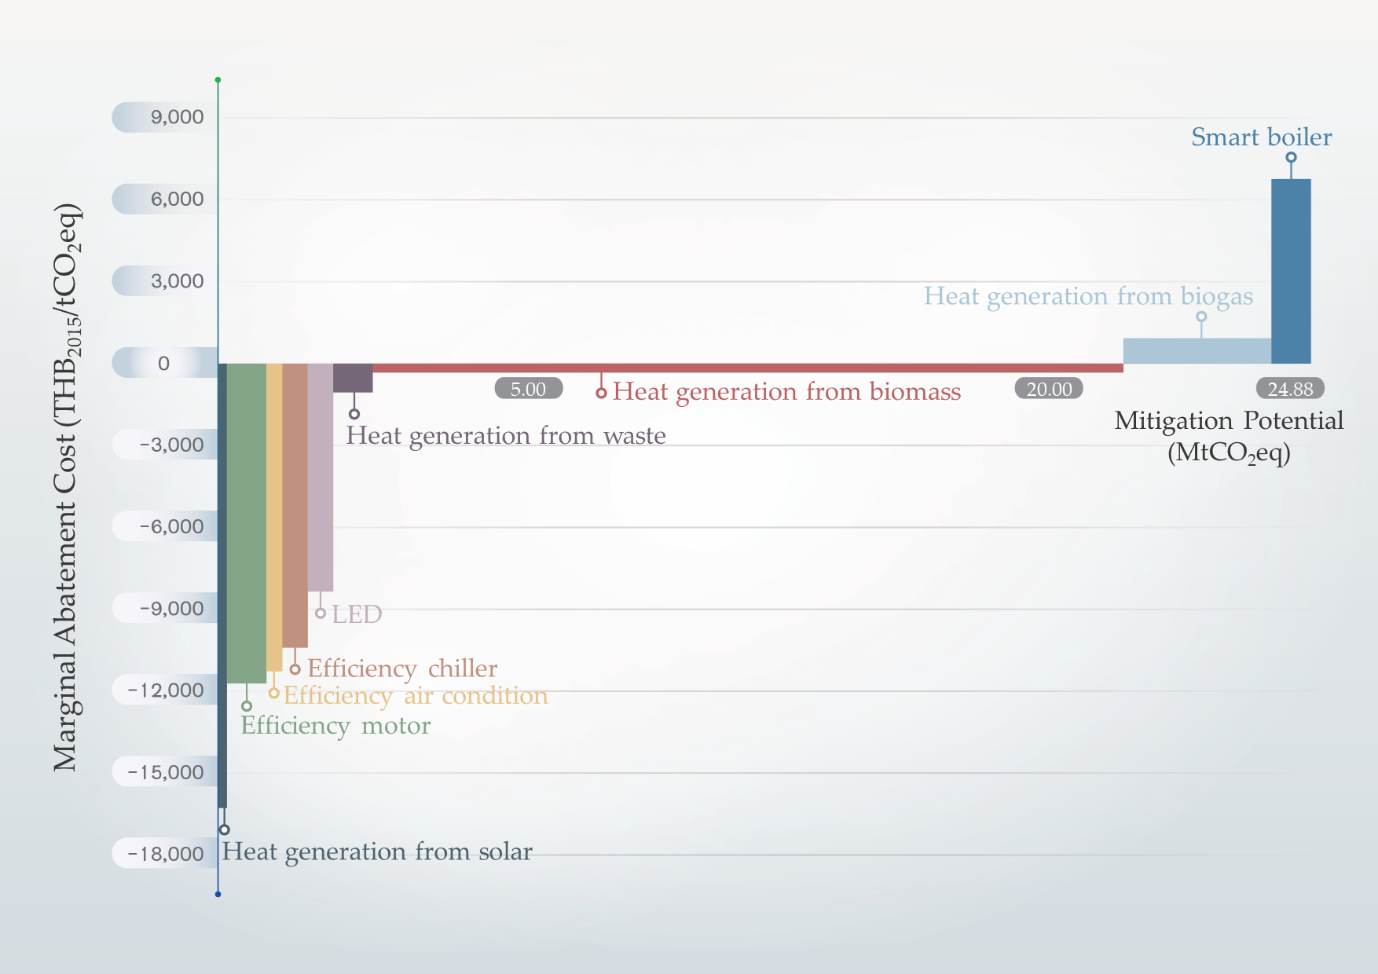
**

**Figure S1.** Marginal abatement cost curve of GHG technology in industry sector in 2020.

**
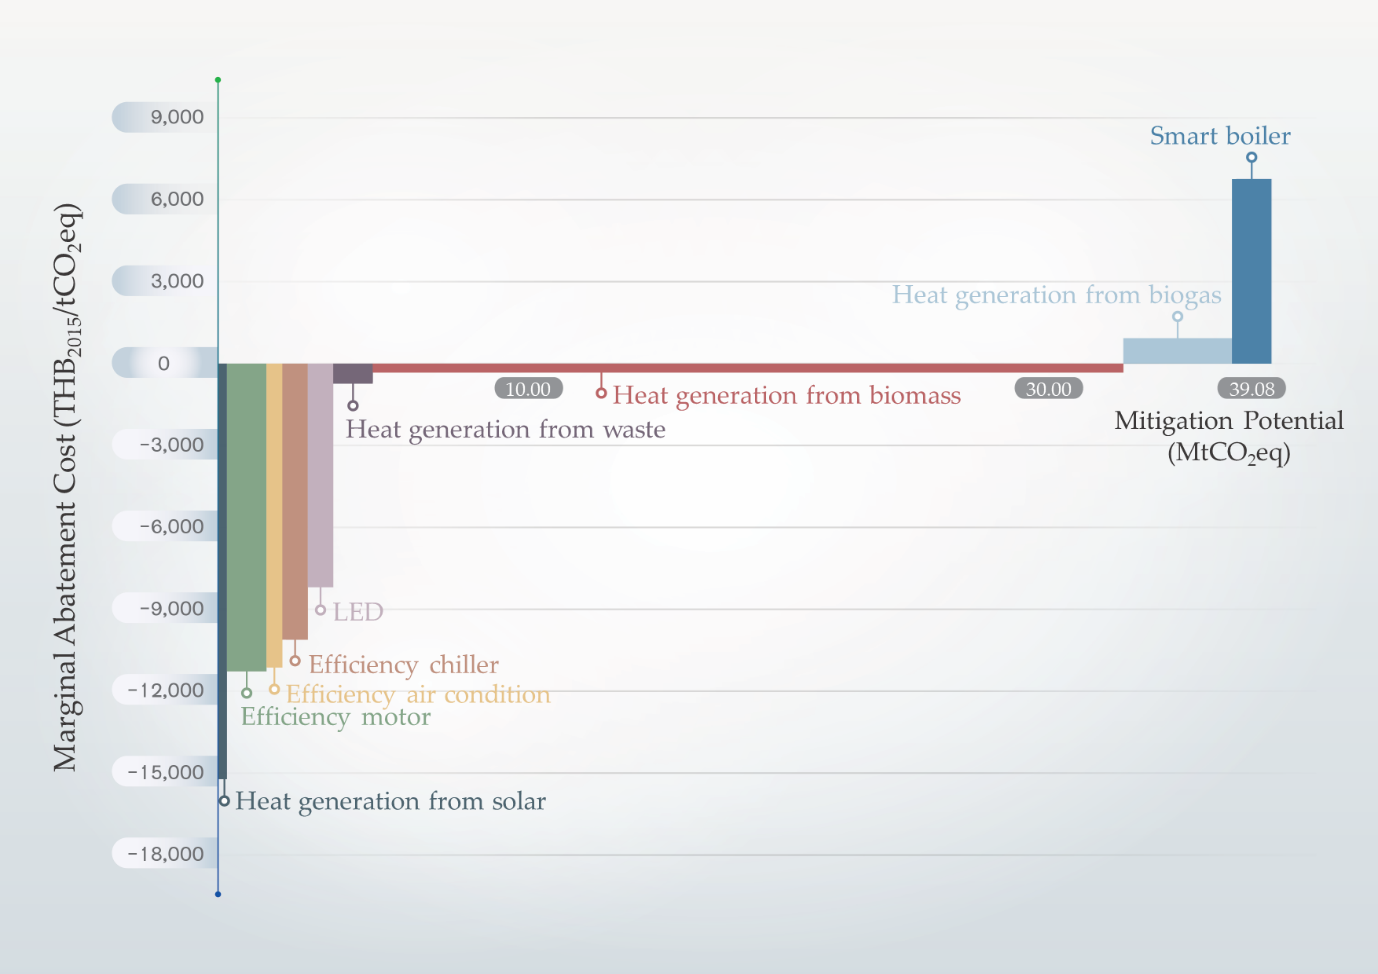
**

**Figure S2.** Marginal abatement cost curve of GHG technology in industry sector in 2025.

**
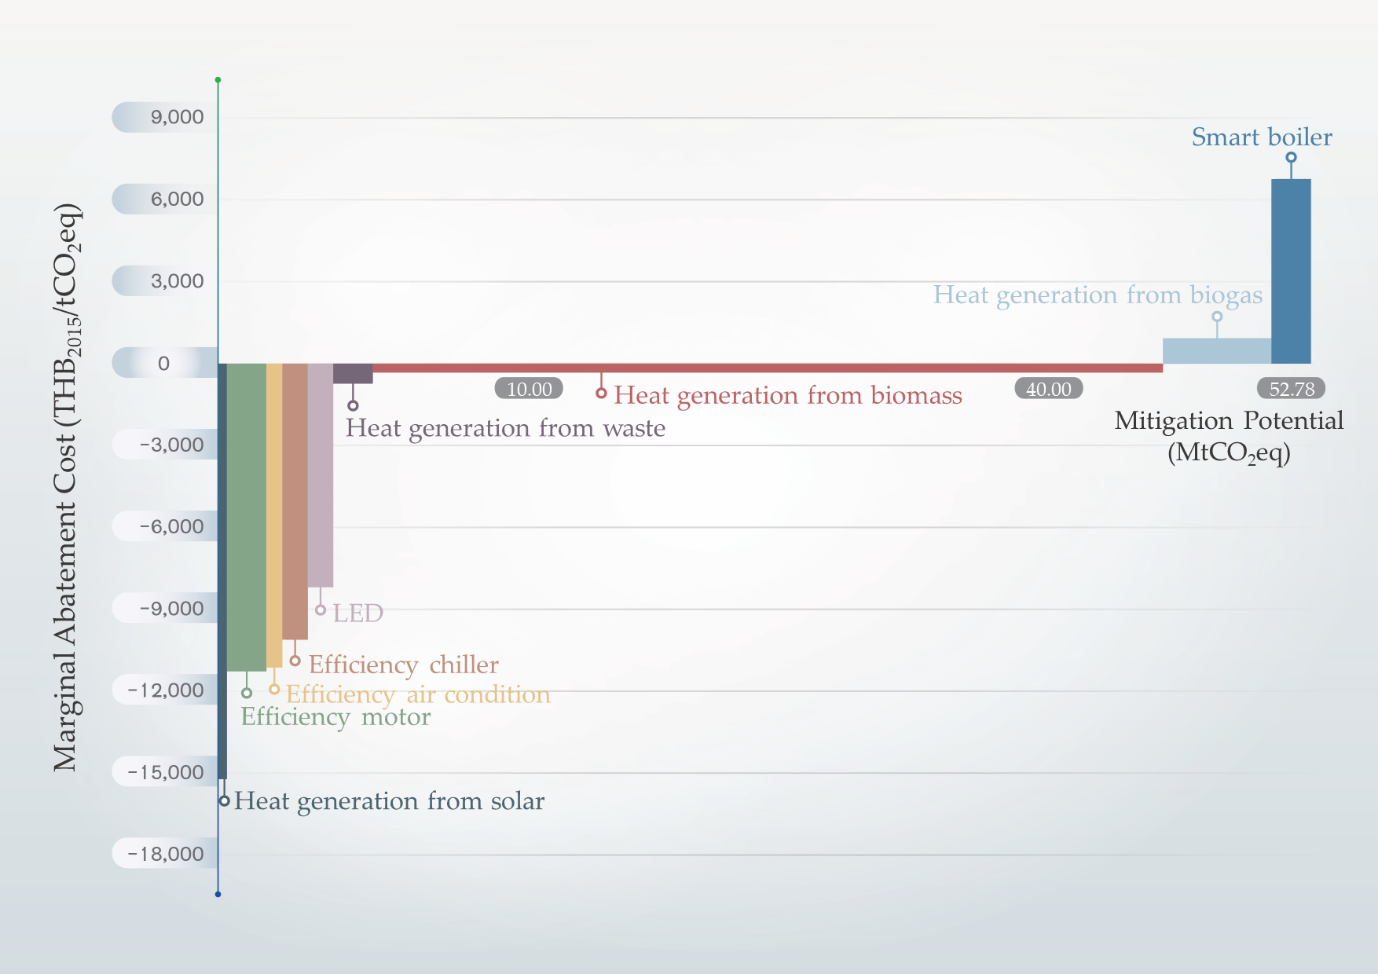
**

**Figure S3.** Marginal abatement cost curve of GHG technology in industry sector in 2030.


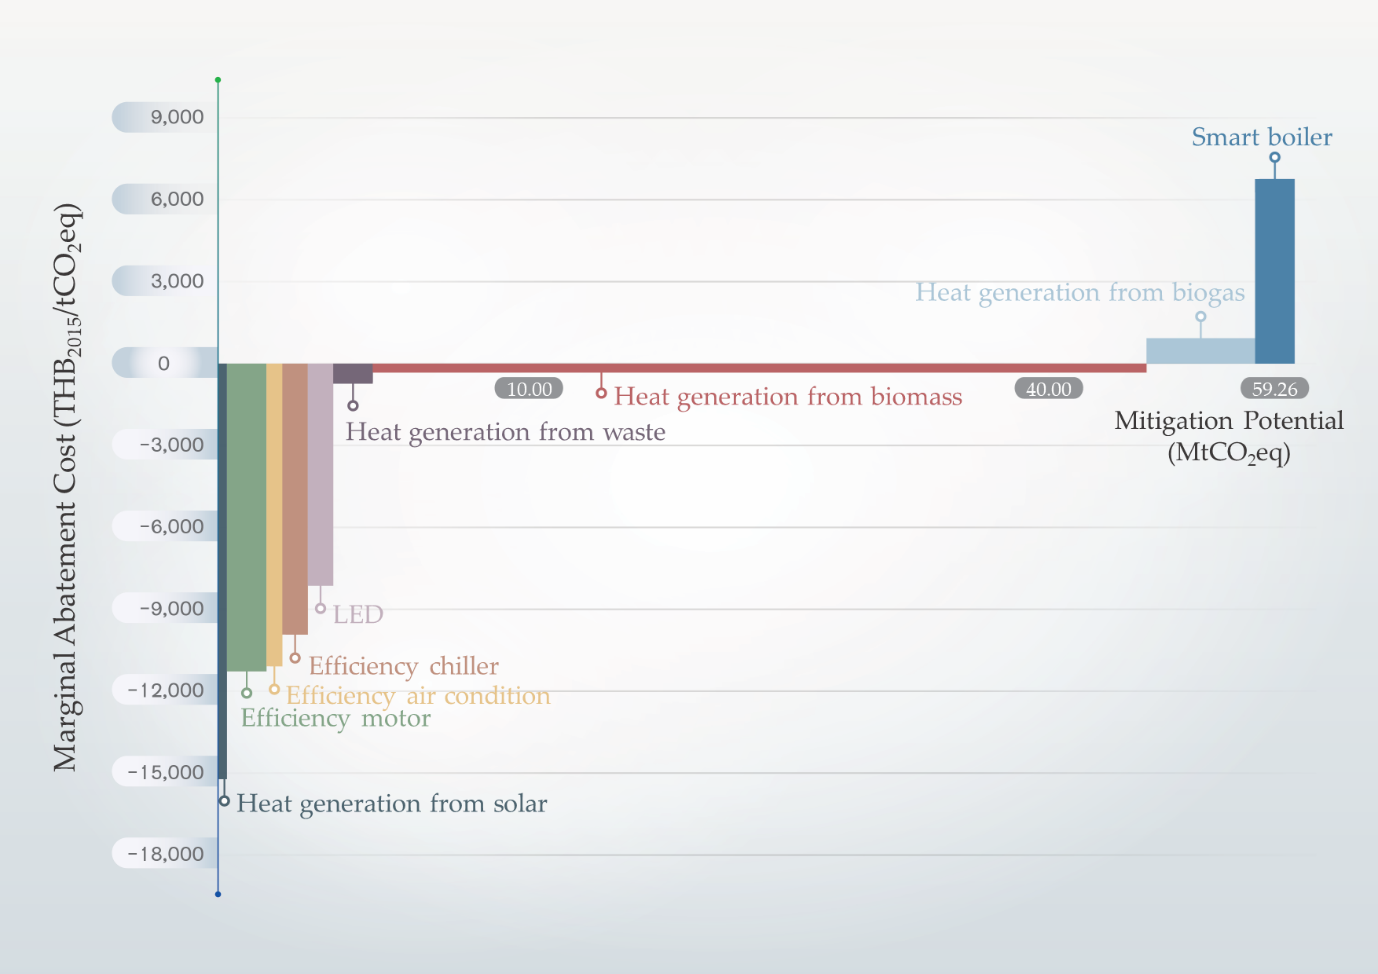


**Figure S4.** Marginal abatement cost curve of GHG technology in industry sector in 2035.


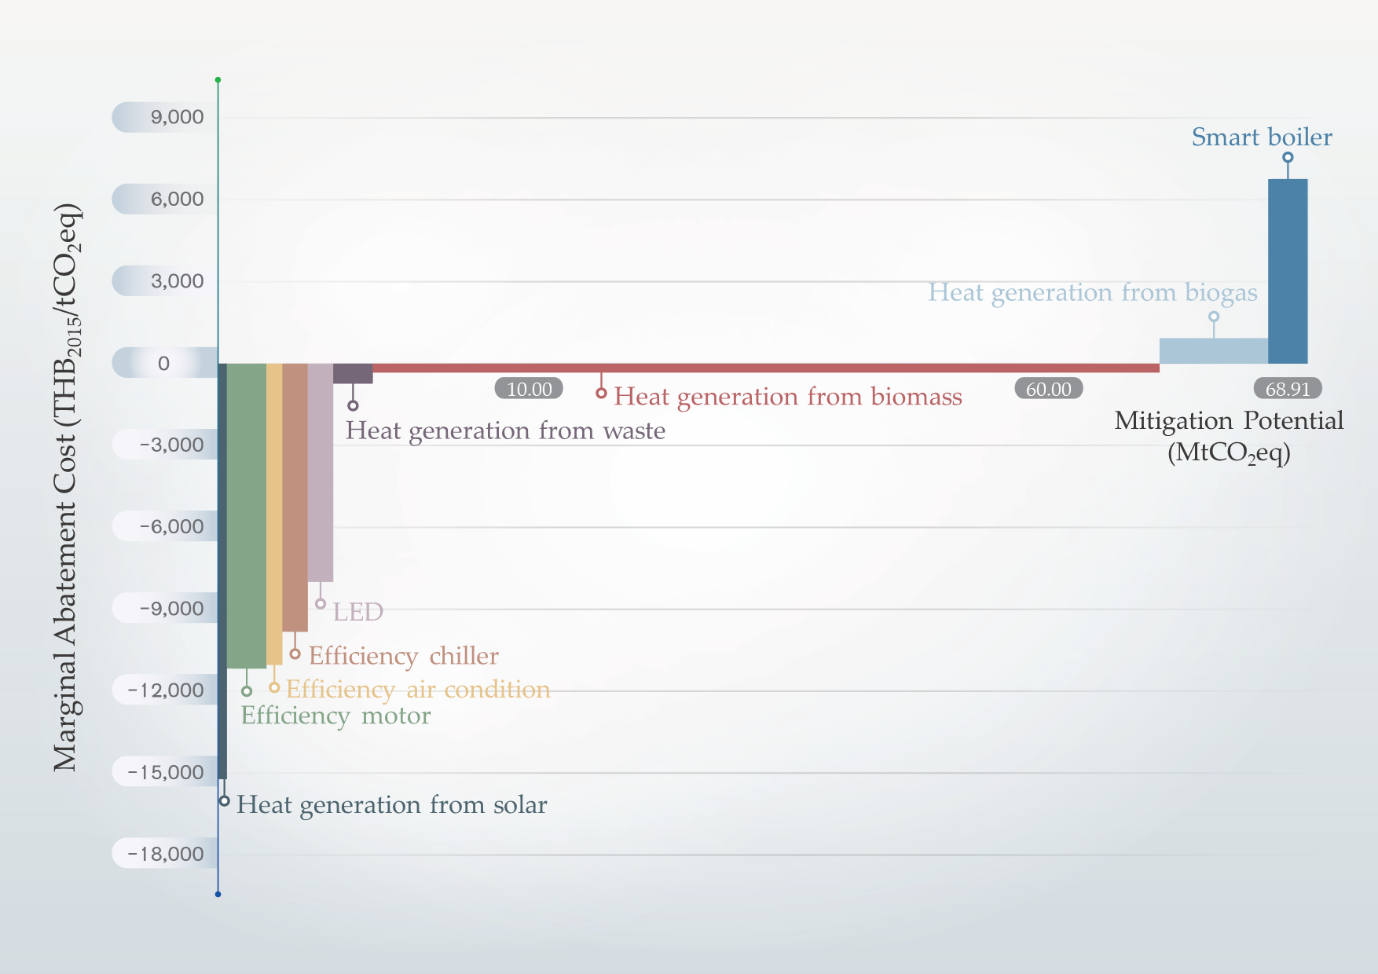


**Figure S5.** Marginal abatement cost curve of GHG technology in industry sector in 2040.

**
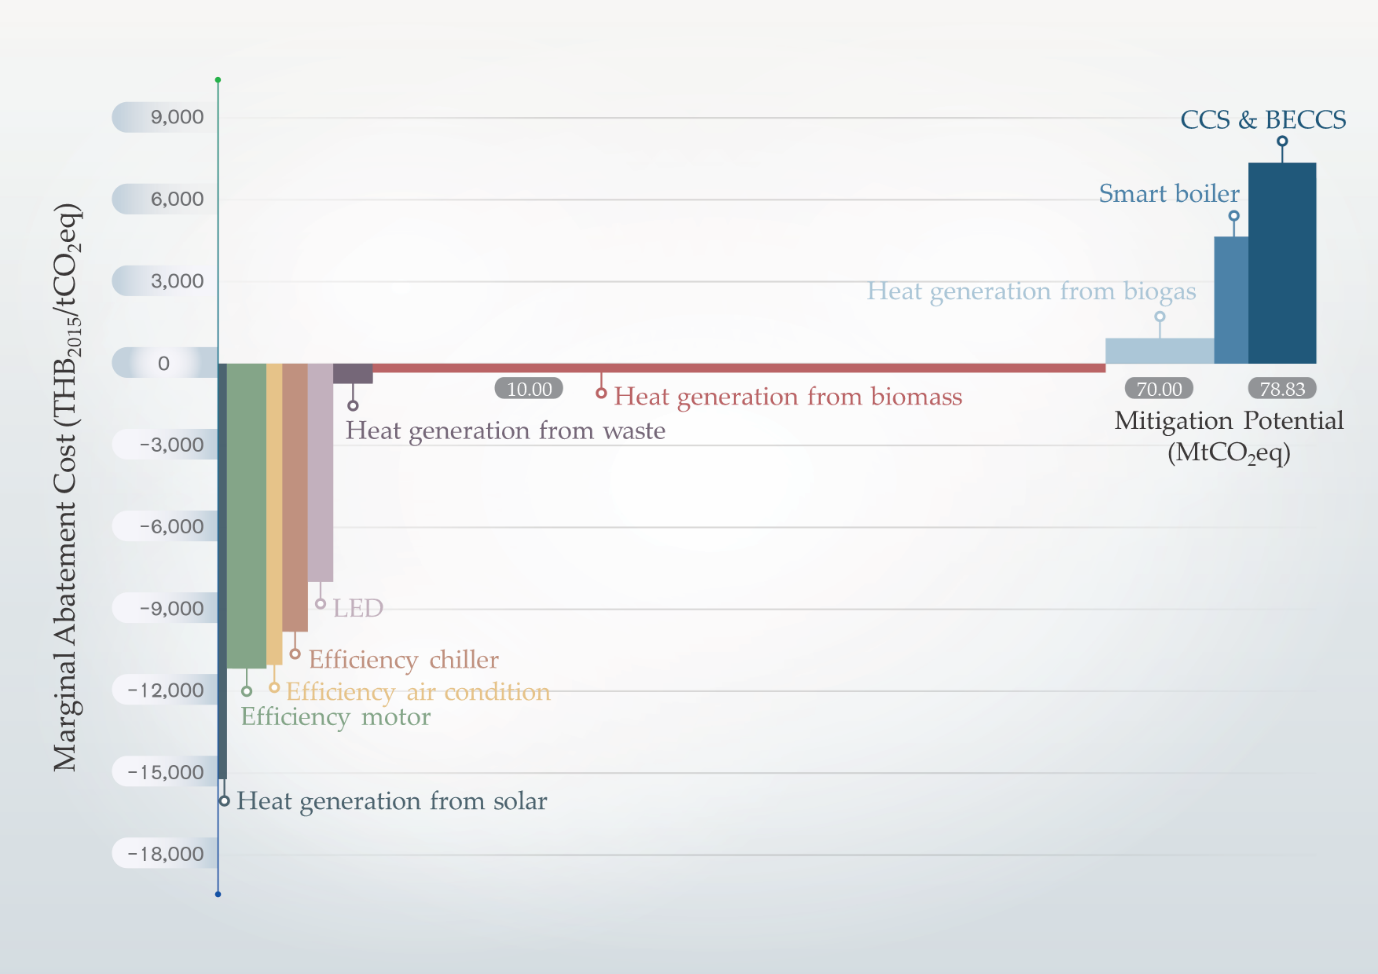
**

**Figure S6.** Marginal abatement cost curve of GHG technology in industry sector in 2045.

**
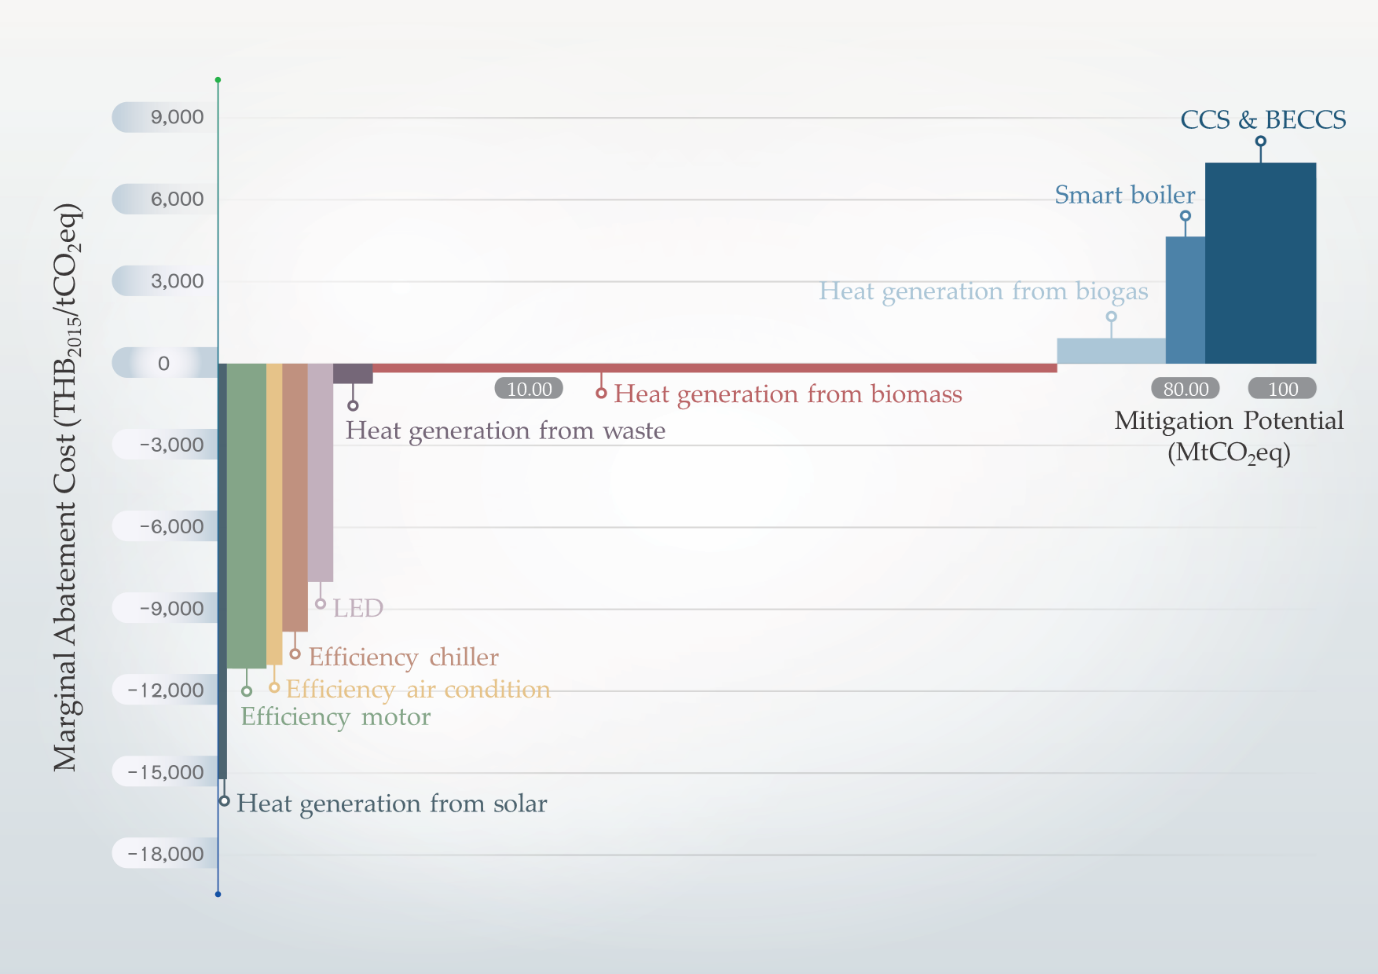
**

**Figure S7.** Marginal abatement cost curve of GHG technology in industry sector in 2050.

**
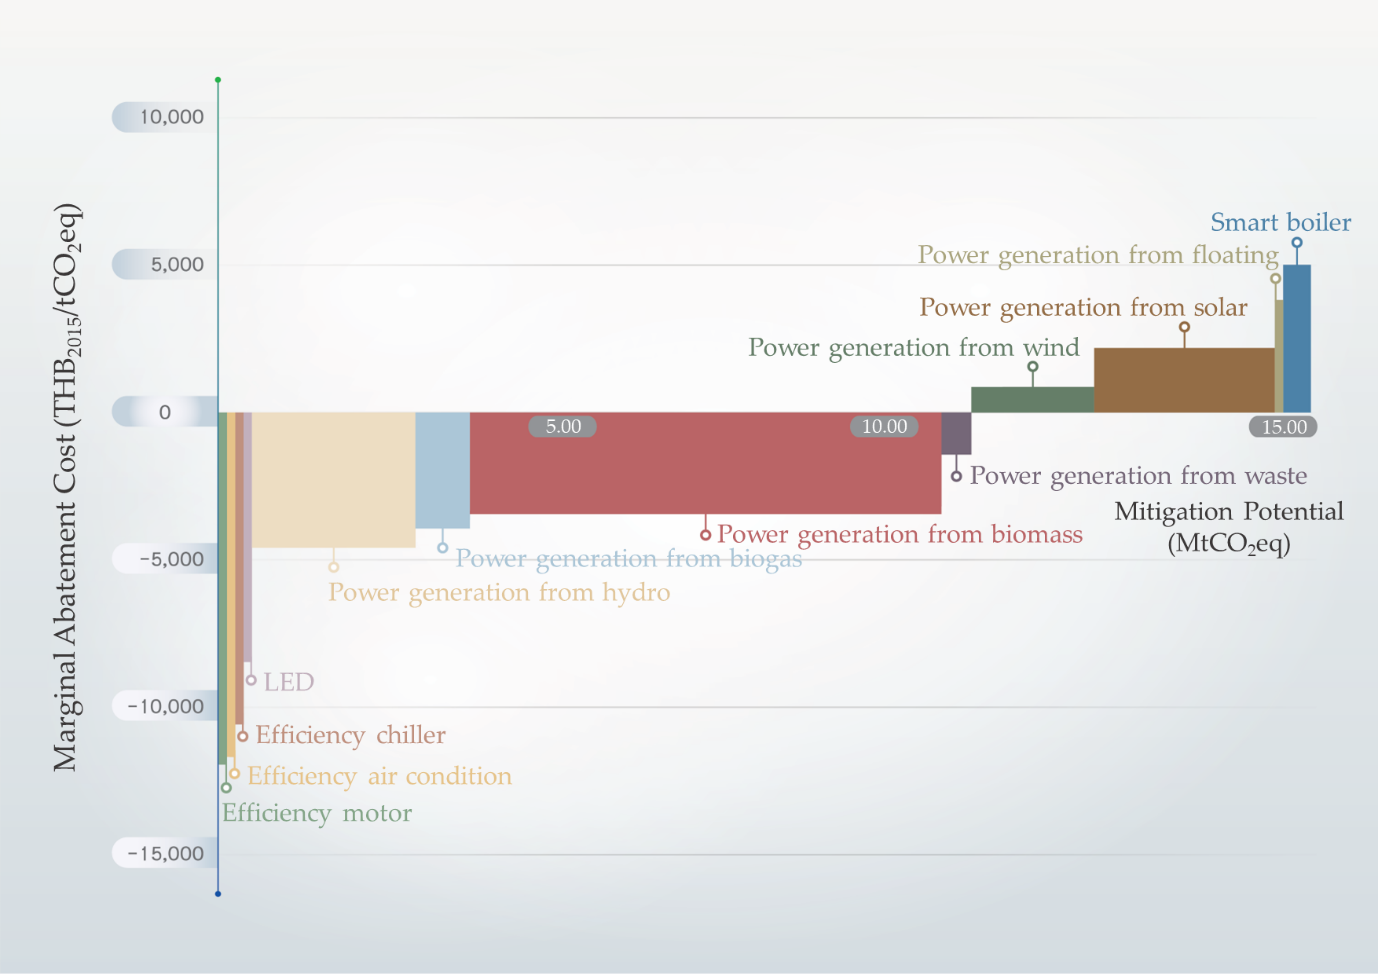
**

**Figure S8.** Marginal abatement cost curve of GHG technology in power sector in 2020.


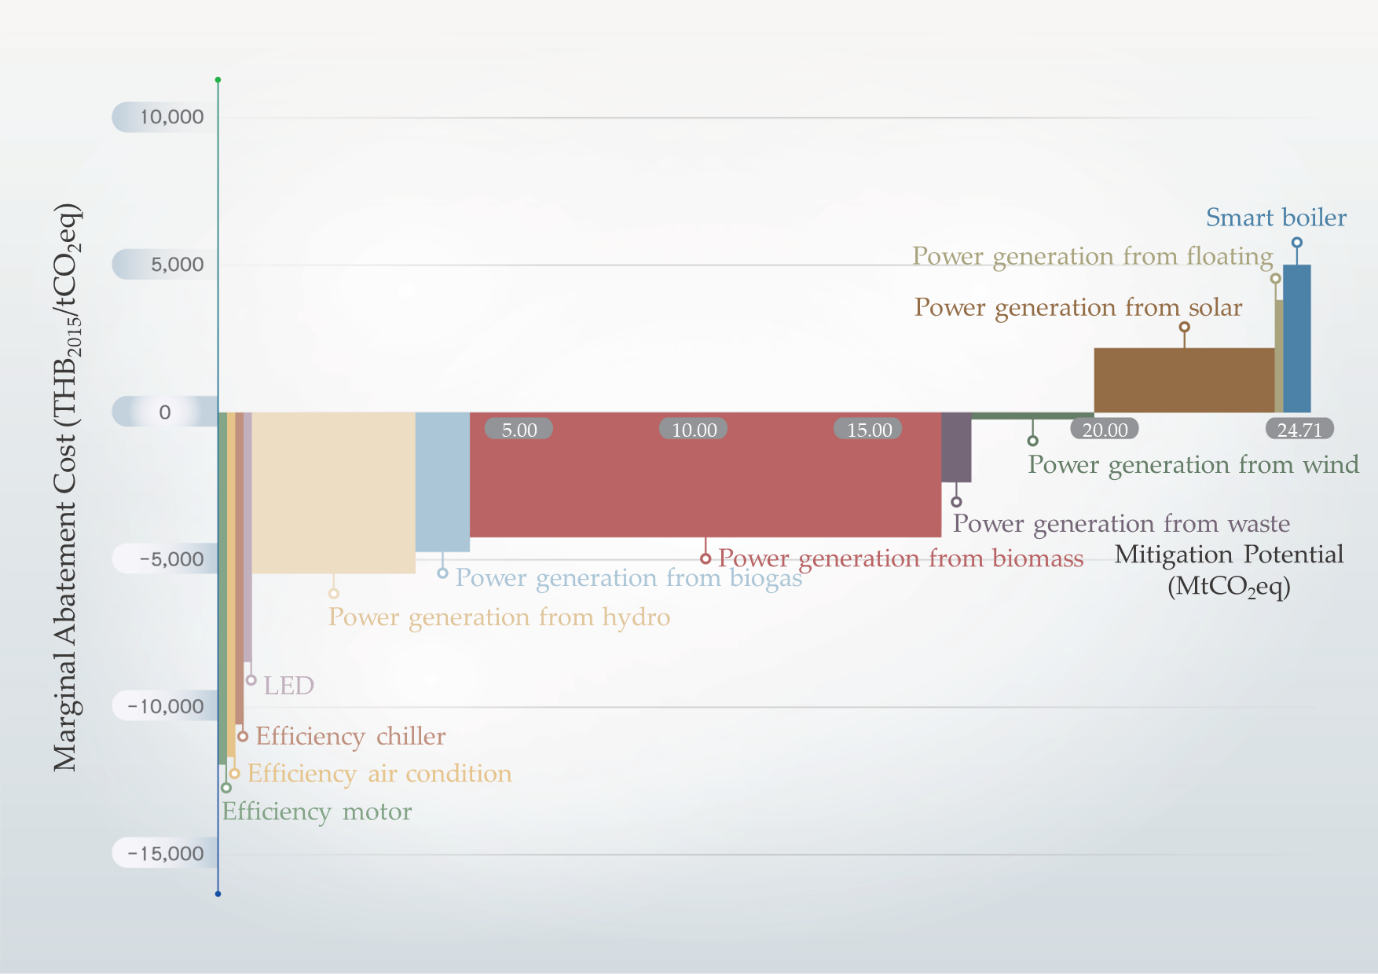


**Figure S9.** Marginal abatement cost curve of GHG technology in power sector in 2025.

**
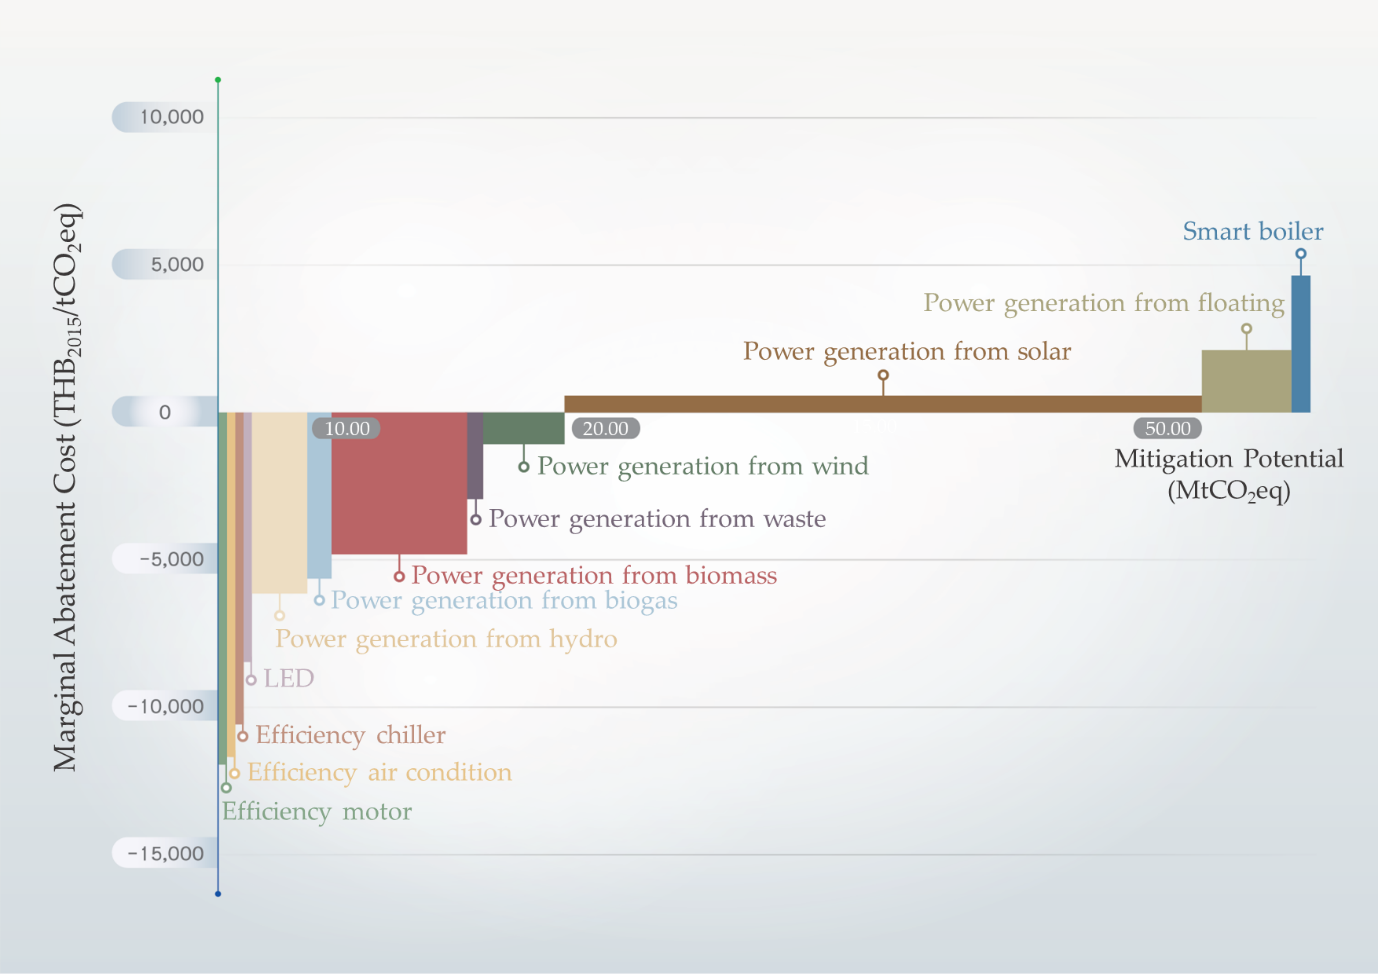
**

**Figure S10.** Marginal abatement cost curve of GHG technology in power sector in 2030.


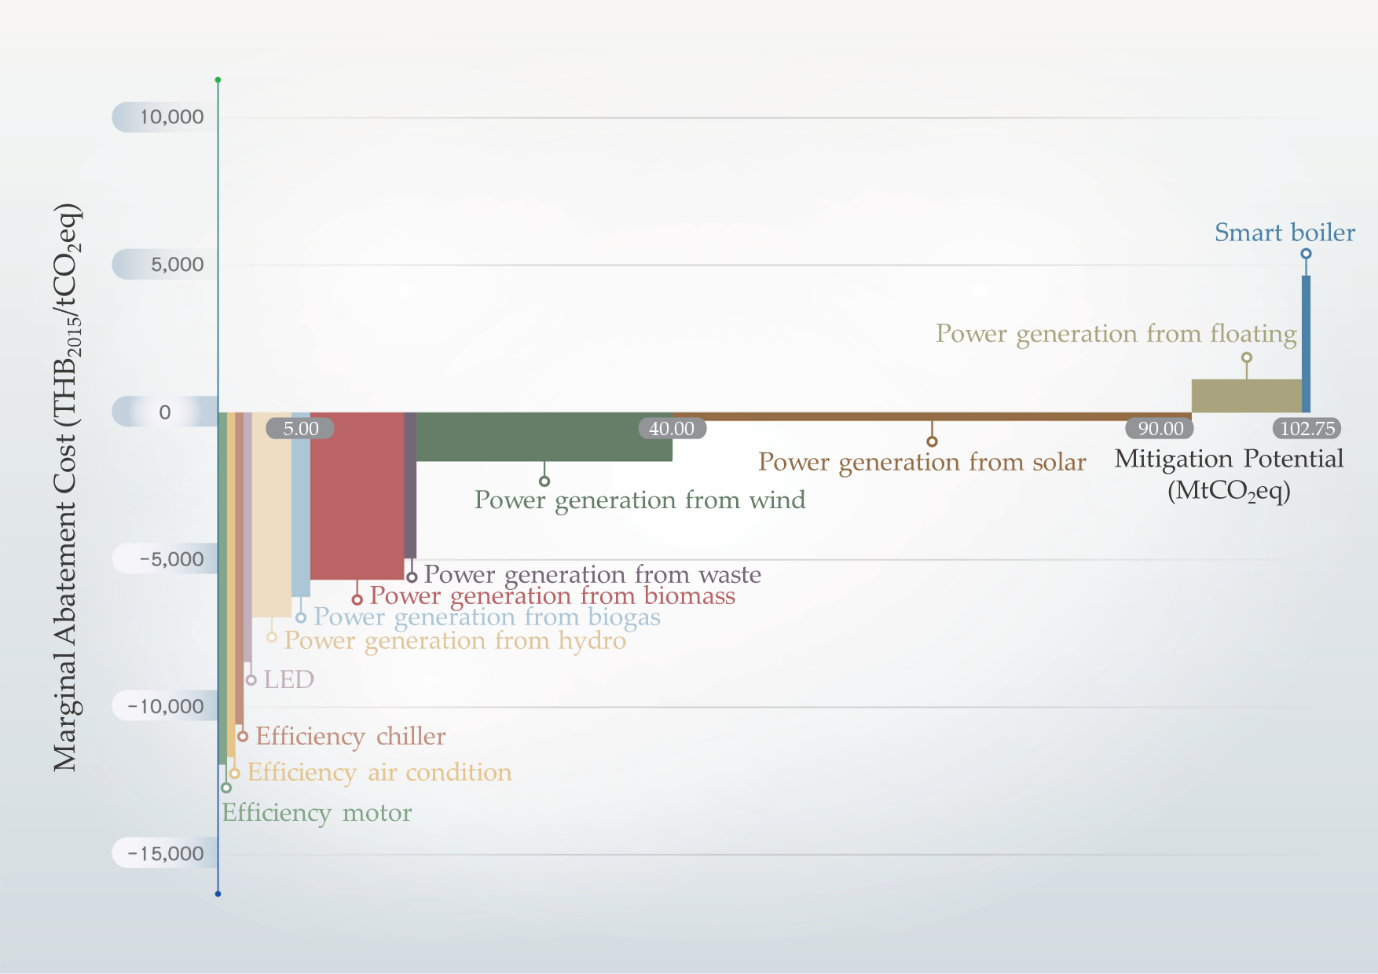


**Figure S11.** Marginal abatement cost curve of GHG technology in power sector in 2035.


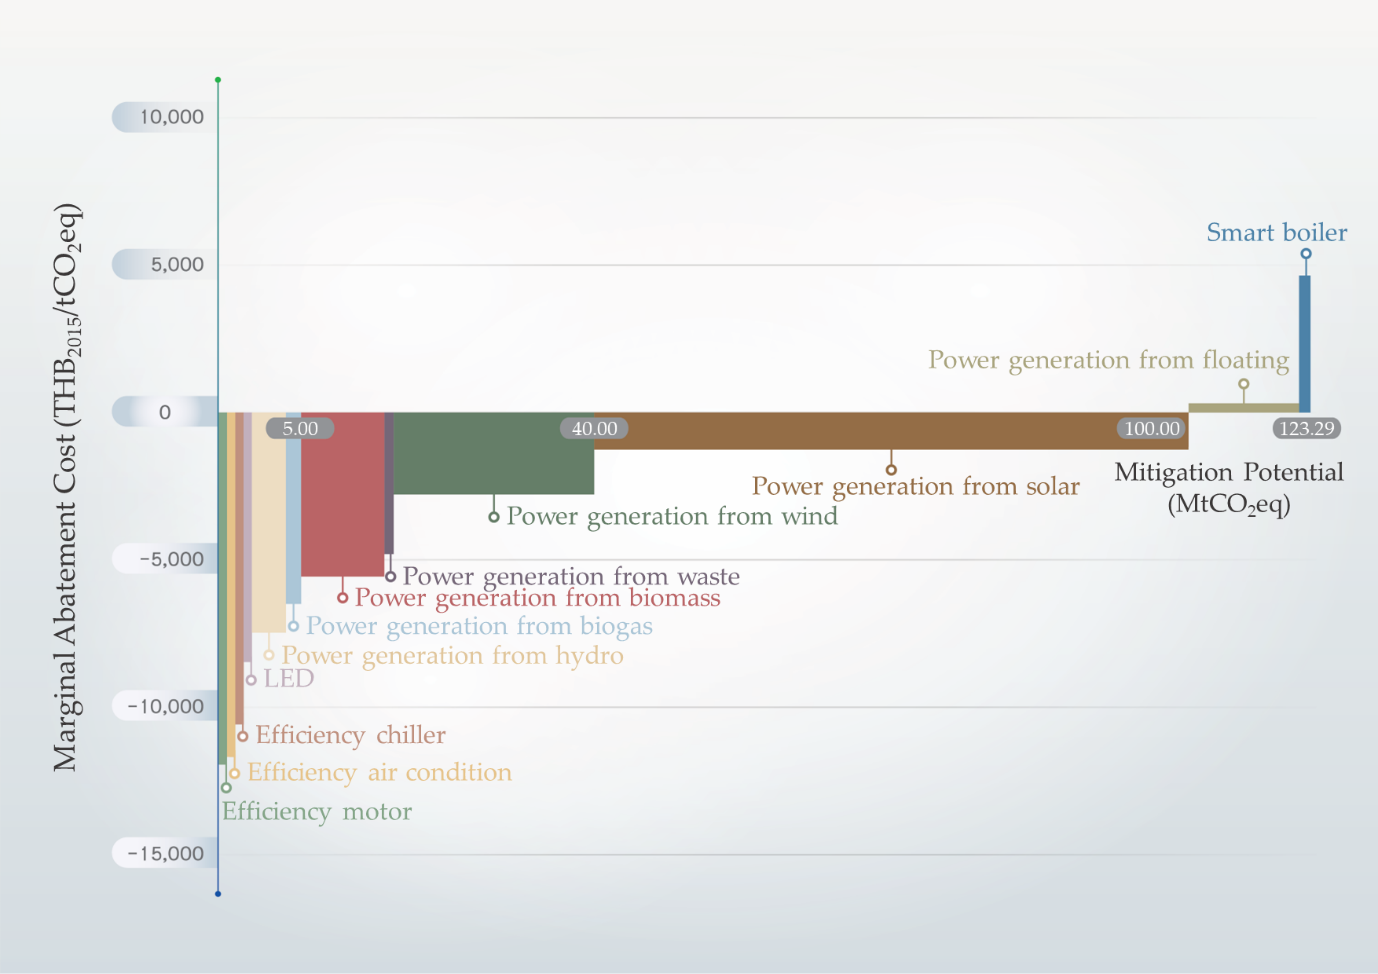


**Figure S12.** Marginal abatement cost curve of GHG technology in power sector in 2040.

**
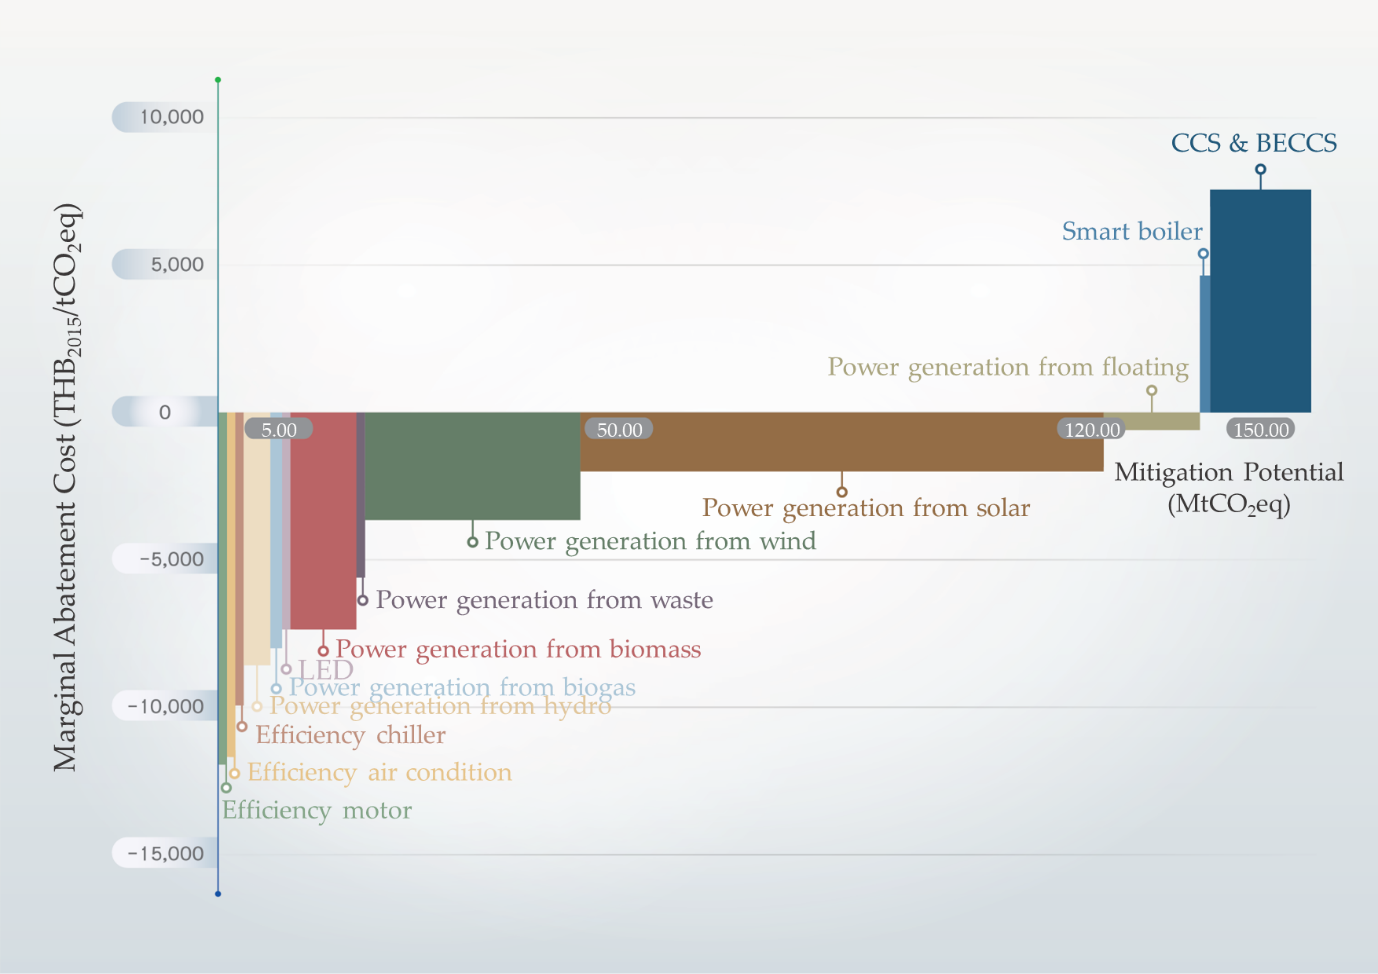
**

**Figure S13.** Marginal abatement cost curve of GHG technology in power sector in 2045.

**
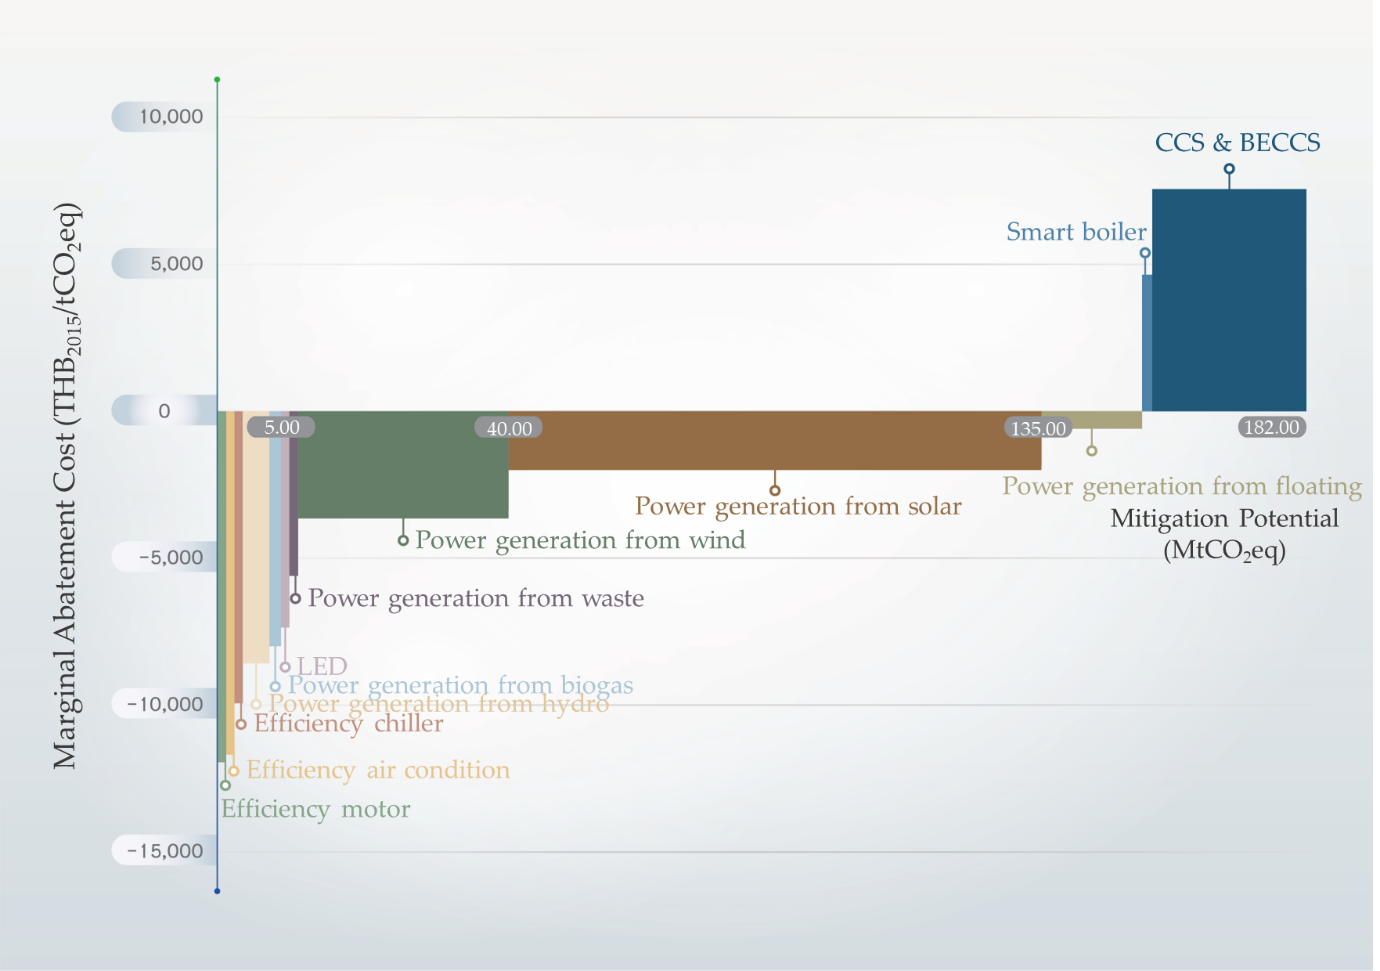
**

**Figure S14.** Marginal abatement cost curve of GHG technology in power sector in 2050.
